# Supplementary material
Source: HighWire-hosted journal article supplement (https://cmaj.ca/highwire/filestream/57730/field_highwire_adjunct_files/0/work-stiell-1-at.pdf)
Supplement: work-stiell-1-at.pdf [file work-stiell-1-at.pdf]

## Appendix 1: Canadian CT Head Rule\*

**CT Head Rule is only required for patients with minor head injuries with any one of the following:**

High risk (for neurological intervention)

- GCS score < 15 at 2 h after injury
- Suspected open or depressed skull fracture
- Any sign of basal skull fracture (hemotympanum, "raccoon eyes," cerebrospinal fluid otorrhea/rhinorrhea, Battle sign)
- Vomiting two episodes
- Age ≥ 65 years

Medium risk (for brain injury on CT)

- Amnesia before impact > 30 min
- Dangerous mechanism (pedestrian struck by motor vehicle, occupant ejected from motor vehicle, fall from height > 3 feet or five stairs)

Minor head injury is defined as witnessed loss of consciousness, definite amnesia, or witnessed disorientation in a patient with a GCS score of 13–15.

Note: CT = computed tomography, GCS = Glasgow Coma Scale.

\*Reprinted from The Lancet,<sup>6</sup> with permission from Elsevier.
